# Supplementary material
Source: publisher figshare collection journal article supplement (https://acs.figshare.com/ndownloader/files/11766884)
Supplement: Supplementary file 1 [file 11766884]

# Supporting Information

## A Functional Separator Coated with Sulfonated SEBS to Synergistically Enhance the Electrochemical Performance and Anti-self-discharge Behavior of Li-S Batteries

Kai Yang, Lei Zhong, Yudi Mo, Rui Wen, Min Xiao, Dongmei Han, Shuanjin Wang\*,

Yuezhong Meng\*

The Key Laboratory of Low-carbon Chemistry & Energy Conservation of Guangdong  
Province / State Key Laboratory of Optoelectronic Materials and Technologies, Sun  
Yat-sen University, Guangzhou 510275, PR China

\*Corresponding author; Tel: +86 20 84114113; E-mail: mengyzh@mail.sysu.edu.cn

(Y. Z. Meng) or wangshj@mail.sysu.edu.cn (S. J. Wang).

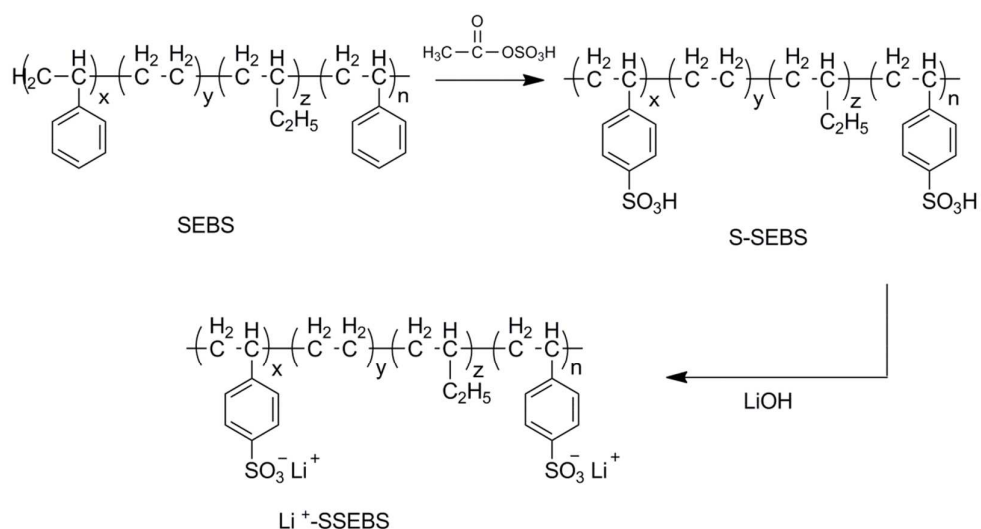

**Figure S1** Synthesis of  $\text{Li}^+$ -SSEBS

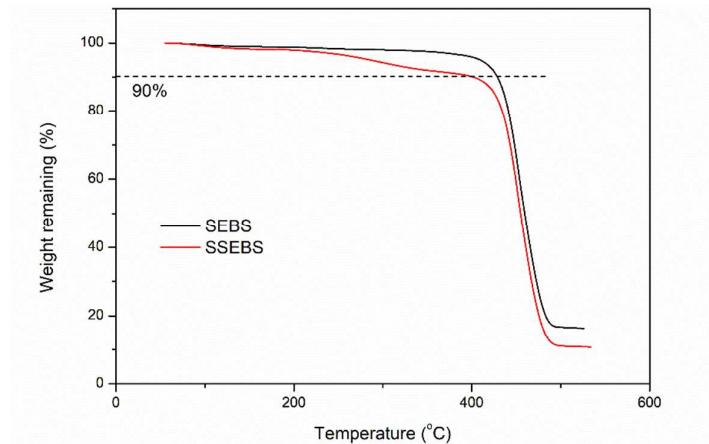

**Figure S2** TGA curves of SEBS and SSEBS

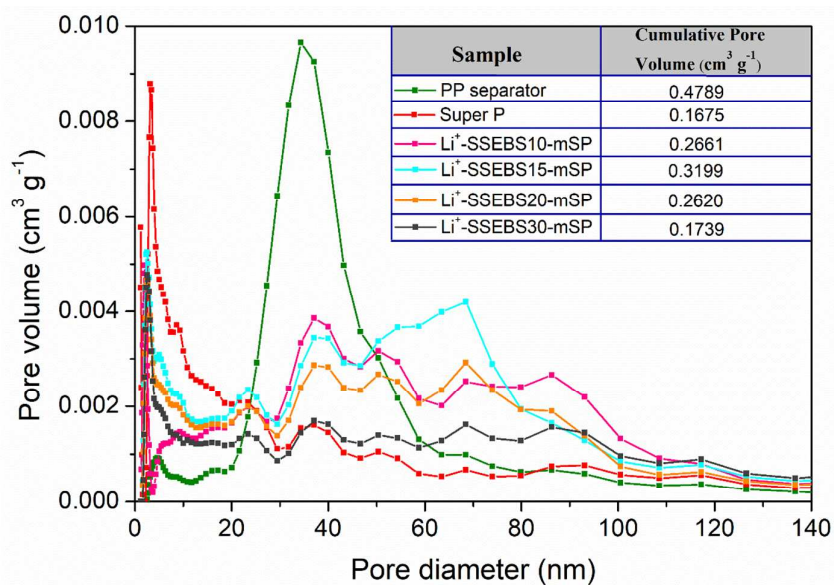

**Figure S3** Pore size distribution and cumulative pore volume (inset table) of different samples.

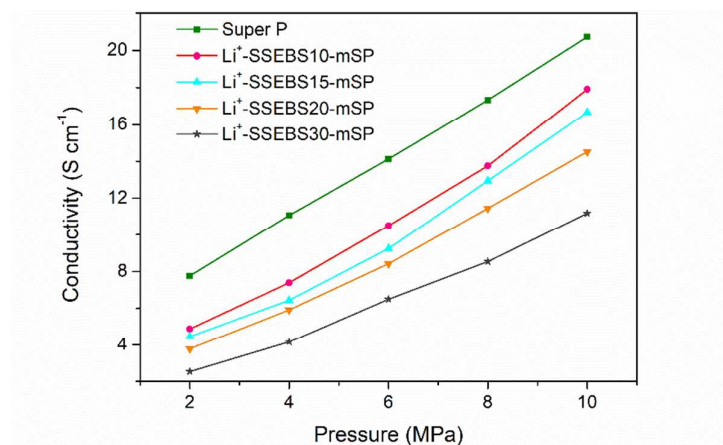

**Figure S4** Conductivity test of different coating layer by four point probe resistivity tester at different pressure.

### Lithium ion diffusion coefficient:

According to reference,<sup>1-2</sup> lithium ion diffusion coefficient can be obtained by the ion-diffusion resistance (the Warburg impedance,  $W_c$ ), which corresponds to a straight inclined line in the low-frequency region. The diffusion coefficient  $\sigma_w$  could be obtained by equation (1):

$$Z' = R_e + R_{ct} + \sigma_w \omega^{-0.5} \quad (1)$$

$\sigma_w$  is the slope for the plots of  $Z'$  vs. the reciprocal root square of the lower angular frequencies ( $\omega^{-0.5}$ ), as shown in Figure S3 and Figure S4. The diffusion coefficient values of the lithium ions ( $D$ ) can be calculated as equation (2):

$$D = 0.5(RT/AF^2\sigma_w C)^2 \quad (2)$$

Where  $R$  is the gas constant ( $8.314 \text{ J mol}^{-1} \text{ K}^{-1}$ ),  $F$  is the Faraday's constant ( $96,500 \text{ C mol}^{-1}$ ),  $T$  is the testing temperature ( $298.5 \text{ K}$ ),  $A$  is the area of the electrode surface and  $C$  is the molar concentration of Li ions. The diffusion coefficient values of the lithium ions ( $D$ ) are listed in Table S1 and S2.

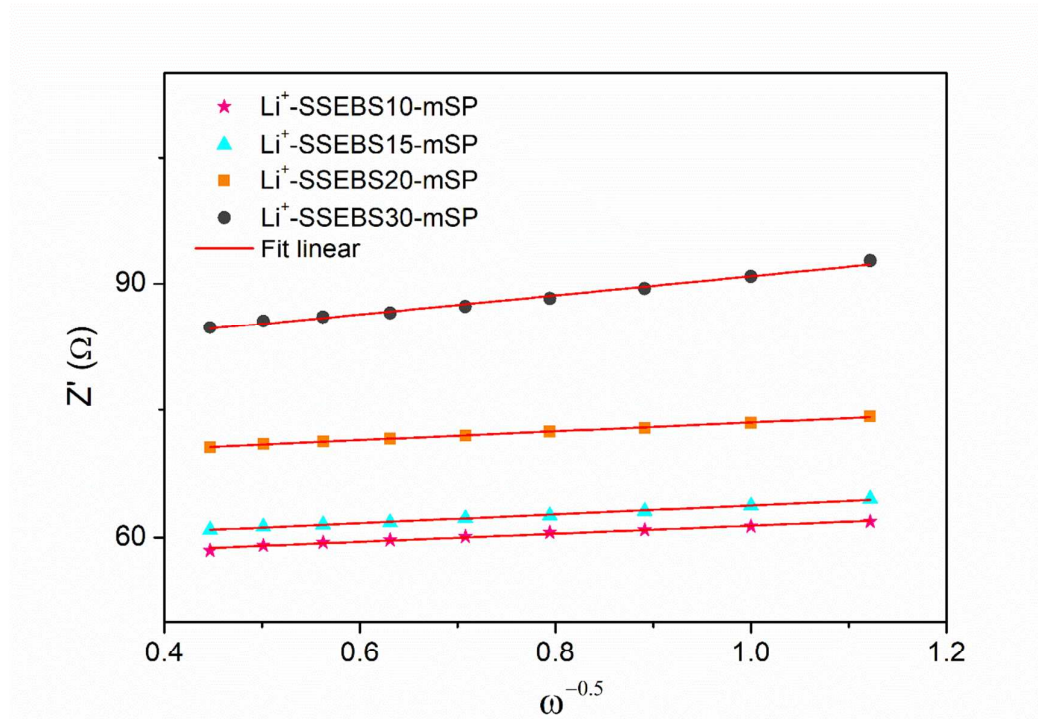

**Figure S5** The relationship between  $Z'$  and  $\omega^{-0.5}$  at low frequencies for Li-S batteries with Li<sup>+</sup>-SSEBS-mSP separators.

### Lithium ion transference number:

The lithium ion transference number ( $t_+$ ) was investigated by Vincent and Bruce's method: using electrochemical impedance spectra combined with steady-state current technique.<sup>3-5</sup> The cell assembled with Li/separator-liquid electrolyte/Li was subjected to a small DC polarization potential ( $\Delta V=10.0$  mV) for enough time to achieve a steady-state current. The interfacial resistances of the cell were measured by AC impedance before and after polarization. The  $t_+$  can be calculated using the equation (3):

$$t_+ = \frac{I_s(\Delta V - I_o R_o)}{I_o(\Delta V - I_s R_s)} \quad (3)$$

Where  $I_o$  and  $I_s$  are the initial and steady-state currents (Figure S), respectively.  $R_o$  and  $R_s$  are the initial and steady-state interfacial resistances, respectively.

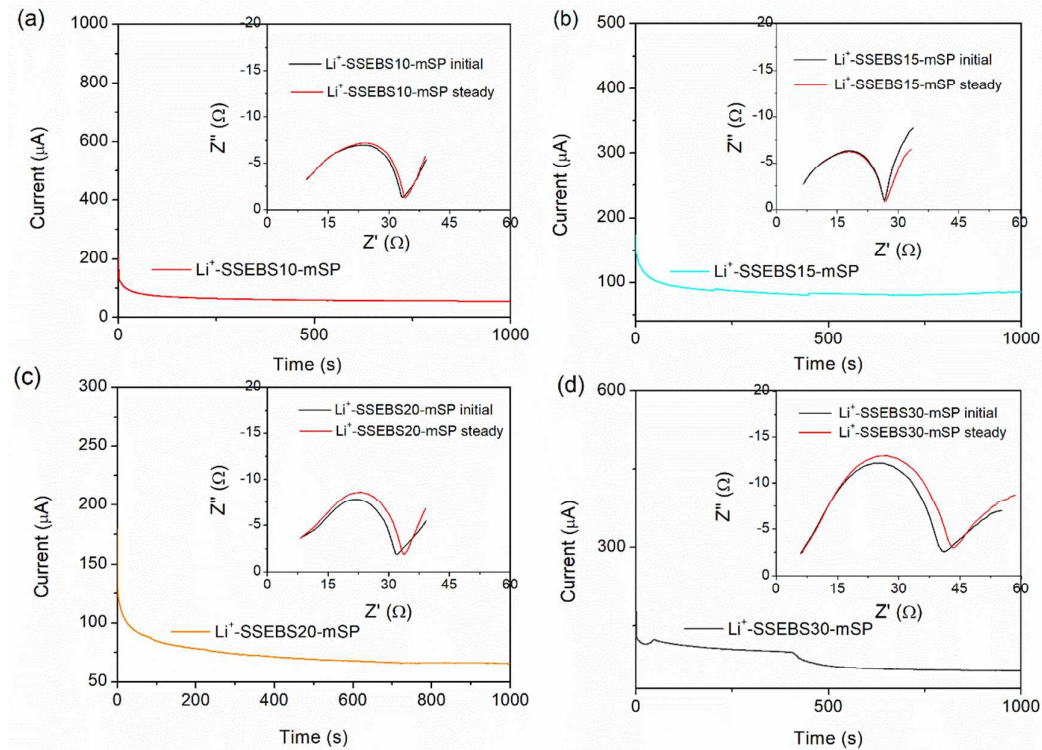

**Figure S6** Li ion transference number measurements. Impedances before and after polarization, and polarization profile: (a) Li<sup>+</sup>-SSEBS10-mSP, (b) Li<sup>+</sup>-SSEBS15-mSP, (c) Li<sup>+</sup>-SSEBS20-mSP and (d) Li<sup>+</sup>-SSEBS30-mSP, respectively.

**Table S1** Impedance parameters and Li<sup>+</sup> transference number of Li<sup>+</sup>-SSEBS-mSP separators.

| Battery                      | Re ( $\Omega$ ) | Rct ( $\Omega$ ) | $\sigma_w$ ( $\Omega$ s <sup>-0.5</sup> ) | D (cm <sup>2</sup> s <sup>-1</sup> ) | Li <sup>+</sup> transference number |
|------------------------------|-----------------|------------------|-------------------------------------------|--------------------------------------|-------------------------------------|
| Li <sup>+</sup> -SSEBS10-mSP | 2.67            | 57.01            | 4.68                                      | $1.05 \times 10^{-9}$                | 0.347                               |
| Li <sup>+</sup> -SSEBS15-mSP | 2.45            | 59.21            | 5.13                                      | $8.7 \times 10^{-10}$                | 0.486                               |
| Li <sup>+</sup> -SSEBS20-mSP | 3.29            | 68.14            | 5.11                                      | $8.8 \times 10^{-10}$                | 0.431                               |
| Li <sup>+</sup> -SSEBS30-mSP | 5.47            | 83.60            | 11.29                                     | $1.64 \times 10^{-10}$               | 0.346                               |

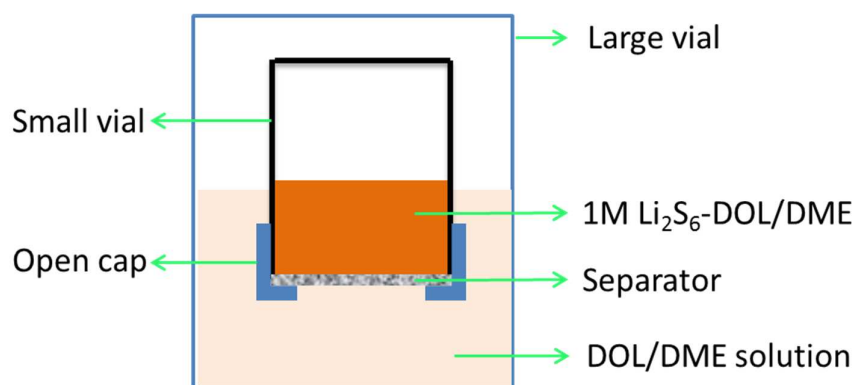

**Figure S7** The schematic illustration of visible diffusion experiment.

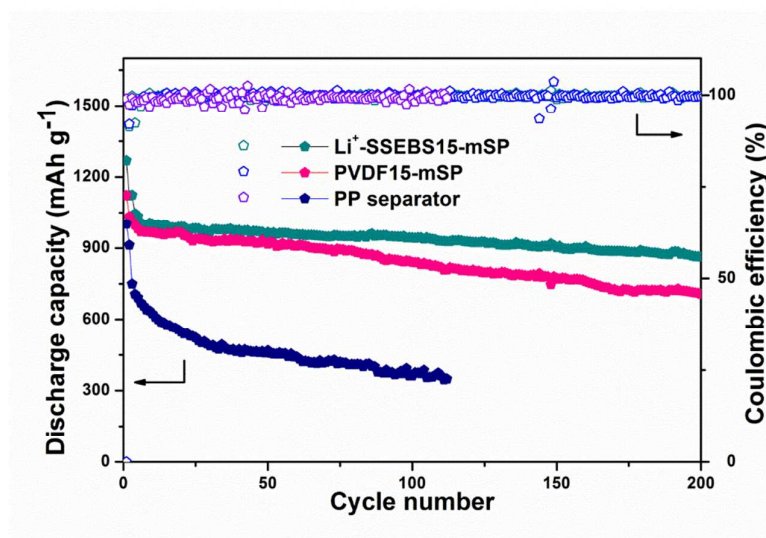

**Figure S8** Cycling performances of lithium sulfur batteries with different separator at



0.5 C for 200 cycles

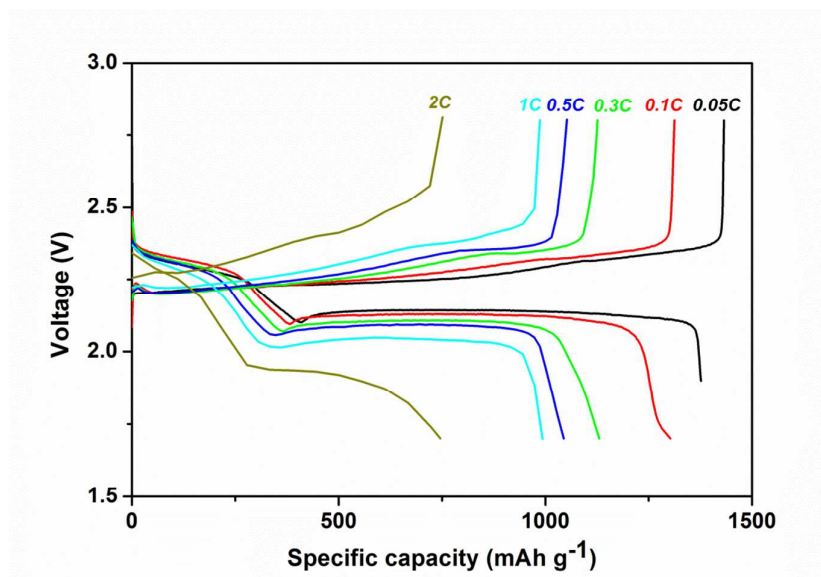

**Figure S9** The discharge-charge profiles of the cell with  $\text{Li}^+$ -SSEBS15-mSP at different current densities.

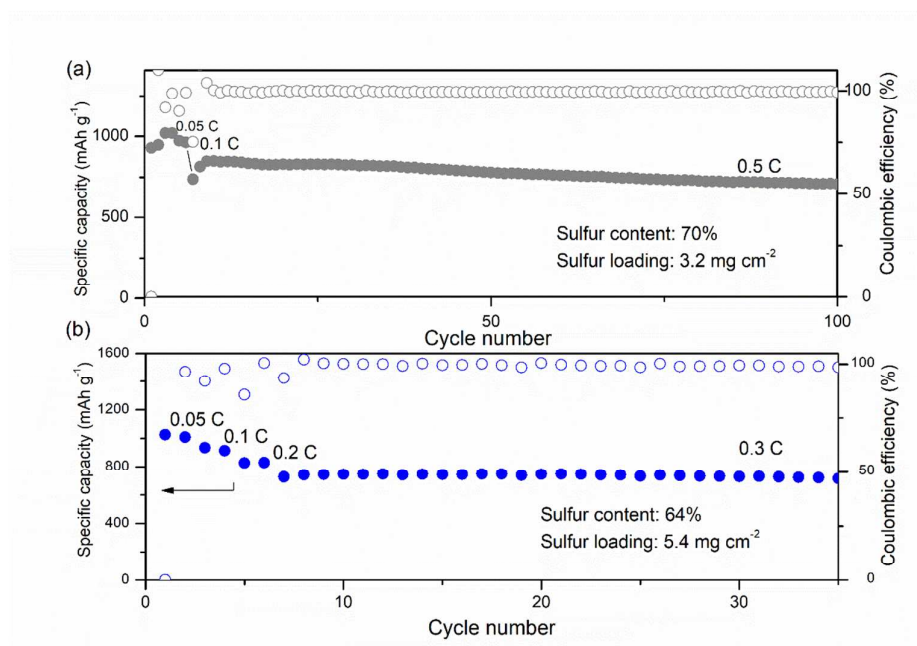

**Figure S10** Cycle performance of Li-S battery with high sulfur loading cathodes (a:  $3.2 \text{ mg cm}^{-2}$ , b:  $5.4 \text{ mg cm}^{-2}$ ) using  $\text{Li}^+$ -SSEBS15-mSP as a separator.

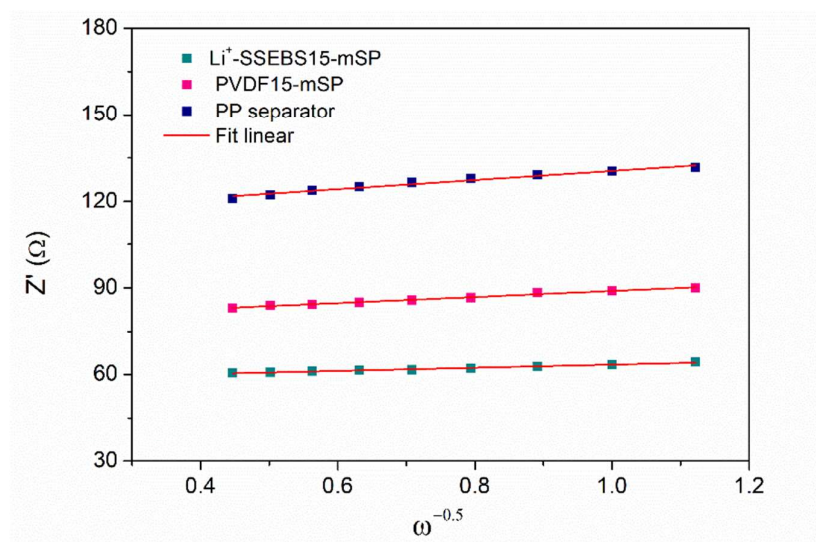

**Figure S11** The relationship between  $Z'$  and  $\omega^{-0.5}$  at low frequencies for batteries with different separator.

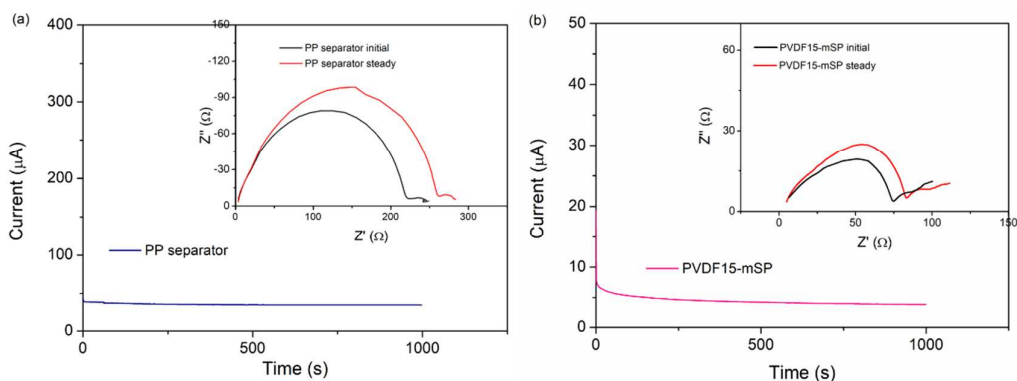

**Figure S12** Li ion transference number measurement. Impedance before and after polarization, and polarization profile: PP separator (a) and PVDF15-mSP (b).

**Table S2** Impedance parameters and  $\text{Li}^+$  transference number of batteries with different separator.

| Battery                                     | Re ( $\Omega$ ) | Rct ( $\Omega$ ) | $\sigma_w (\Omega \text{ s}^{-0.5})$ | D ( $\text{cm}^2 \text{ s}^{-1}$ ) | $\text{Li}^+$ transference number |
|---------------------------------------------|-----------------|------------------|--------------------------------------|------------------------------------|-----------------------------------|
| <b><math>\text{Li}^+</math>-SSEBS15-mSP</b> | 2.45            | 59.21            | 5.13                                 | $8.7 \times 10^{-10}$              | 0.486                             |
| <b>PVDF15-mSP</b>                           | 3.31            | 74.96            | 10.38                                | $2.13 \times 10^{-10}$             | 0.317                             |
| <b>PP separator</b>                         | 5.72            | 111.80           | 15.61                                | $9.43 \times 10^{-11}$             | 0.199                             |

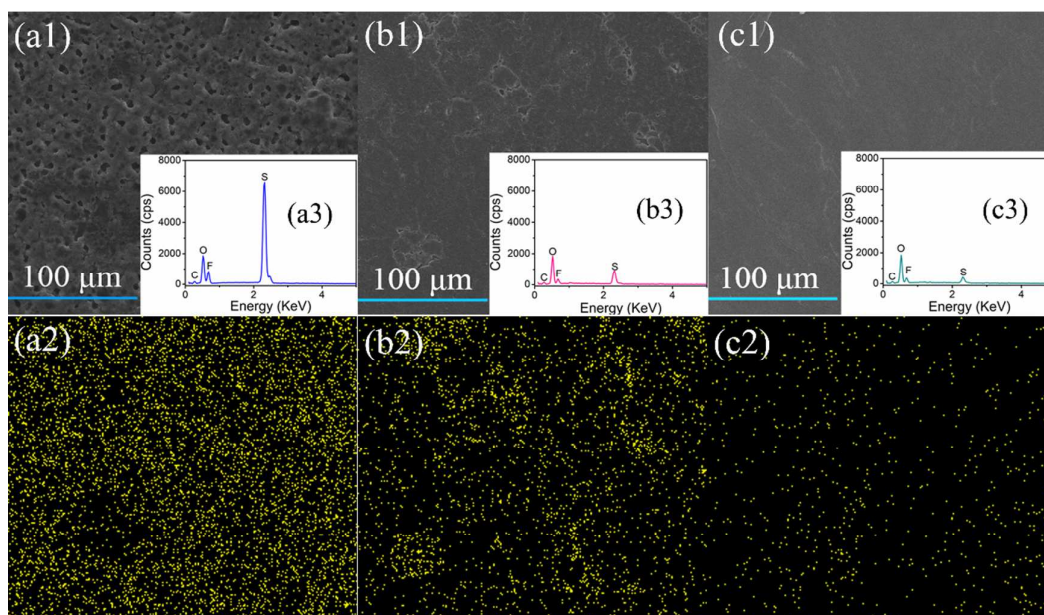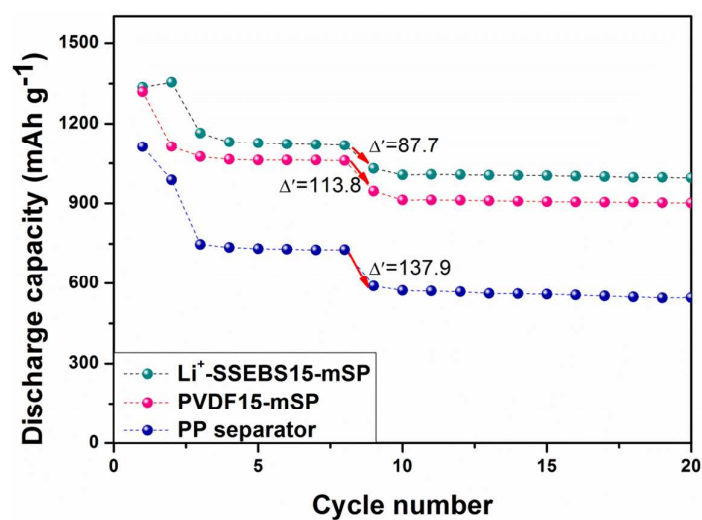

**Figure S14** Discharge capacity-cycle index plots of self-discharge behavior test by the reference's method (interrupted at 2.1 V and rest 72 h during discharge).



**Table S3** Capacity Loss rate values of Li-S batteries with different separators from different self-discharge test method.

| Loss rate value    | Li <sup>+</sup> -SSEBS15-mSP | PVDF15-mSP | PP separator |
|--------------------|------------------------------|------------|--------------|
| Reference's method | 7.8%                         | 10.7%      | 18.9%        |
| This work' method  | 8.8 %                        | 12.3%      | 26.4%        |

## Reference

- (1) Xu, R.; Huang, X.; Lin, X.; Cao, J.; Yang, J.; Lei, C., The functional aqueous slurry coated separator using polyvinylidene fluoride powder particles for Lithium-ion batteries. *J. Electroanal. Chem.* **2017**, *786*, 77-85.
- (2) Zhao, D.; Qian, X.; Jin, L.; Yang, X.; Wang, S.; Shen, X.; Yao, S.; Rao, D.; Zhou, Y.; Xi, X., Separator modified by Ketjen black for enhanced electrochemical performance of lithium–sulfur batteries. *Rsc.Adv.* **2016**, *6*, 13680-13685.
- (3) Evans, J.; Vincent, C. A.; Bruce, P. G., Electrochemical measurement of transference numbers in polymer electrolytes. *Polymer* **1987**, *28*, 2324-2328.
- (4) Lin, C.-E.; Zhang, H.; Song, Y.-Z.; Zhang, Y.; Yuan, J.-J.; Zhu, B.-K., Carboxylated polyimide separator with excellent lithium ion transport properties for a high-power density lithium-ion battery. *J. Mater.Chem. A* **2018**, *6*, 991-998.
- (5) Ma, L.; Nath, P.; Tu, Z.; Tikekar, M.; Archer, L. A., Highly Conductive, Sulfonated, UV-Cross-Linked Separators for Li–S Batteries. *Chem. Mater.* **2016**, *28*, 5147-5154.
